# Supplementary material
Source: publisher figshare collection journal article supplement (https://f1000.figshare.com/articles/dataset/_/98606)
Supplement: Supplementary file 1 [file 1]

# **“Structured Physical Examination Skills Training”**

## **Feedback on the session from faculty**

Department: .....

System: .....

Session: I / II / III / IV

Group: A / B / C / D / E / F / G

Subgroup: 1 or 2

1. Which sub-session/s went well:            i) Tutorial            ii) Demonstration            iii) Practice            iv) All  
(Encircle you believe)
2. Areas of improvement .....
3. How it/these could be improved .....
4. What could be done differently .....
5. Do you think these teaching/learning sessions conducted as per protocol and with these teaching/learning sessions Students' clinical reasoning and diagnostic skills developed early in clinical years 1= strongly disagree, 2= disagree, 3= neutral, 4= agree, 5= strongly agree (encircle one)

Name of faculty (Optional) .....
