# Supplementary material
Source: publisher figshare collection journal article supplement (https://f1000.figshare.com/articles/dataset/_/98606)
Supplement: Supplementary file 2 [file 1]

## **“Structured Physical Examination Skills Training”**

### **Feedback on the session from students**

Department: .....

System: .....

Session: I / II / III / IV

Group: A / B / C / D / E / F / G

Subgroup: 1 or 2

*Q1. A. Please encircle one of the score:*

|      |                                                                          |   |   |   |   |   |
|------|--------------------------------------------------------------------------|---|---|---|---|---|
| i.   | The objectives of the session were clearly delineated                    | 1 | 2 | 3 | 4 | 5 |
| ii.  | The facilitator fulfilled their role effectively as per the objectives   | 1 | 2 | 3 | 4 | 5 |
| iii. | The facilitators succeeded in creating friendly environment for learning | 1 | 2 | 3 | 4 | 5 |
| iv.  | The learning activities during the tutorial were to my satisfaction      | 1 | 2 | 3 | 4 | 5 |
| v.   | The learning activities during the demonstration were to my satisfaction | 1 | 2 | 3 | 4 | 5 |
| vi.  | The learning activities during the practice were to my satisfaction      | 1 | 2 | 3 | 4 | 5 |
| vii. | The session will be important to my future practice                      | 1 | 2 | 3 | 4 | 5 |

1= strongly disagree, 2= disagree, 3= neutral, 4= agree, 5= strongly agree

Q1. B. I would rate the session .....on a scale of 1 to 10 (1 being the least and 10 being the most important)  
Use whole numbers only

2. Which sub-session you liked most (please encircle)      a) tutorial b) demonstration c) practice d) All

3. Suggestion/s for improvement .....

4. Any other comments: *(Please use back of the sheet if necessary)*
